# Supplementary material for: Time-Dynamic Analysis of Sex-Specific NREM Sleep Disturbance Induced by Social Isolation Among Adolescent Mice
Source: Research Square preprint supplement (doi:10.21203/rs.3.rs-6828480/v1), 2025-06-23
Supplement: Supplementary file 1 [file f1d4ef0e06a0000217f4b22b.docx]

**Supplemental figures**


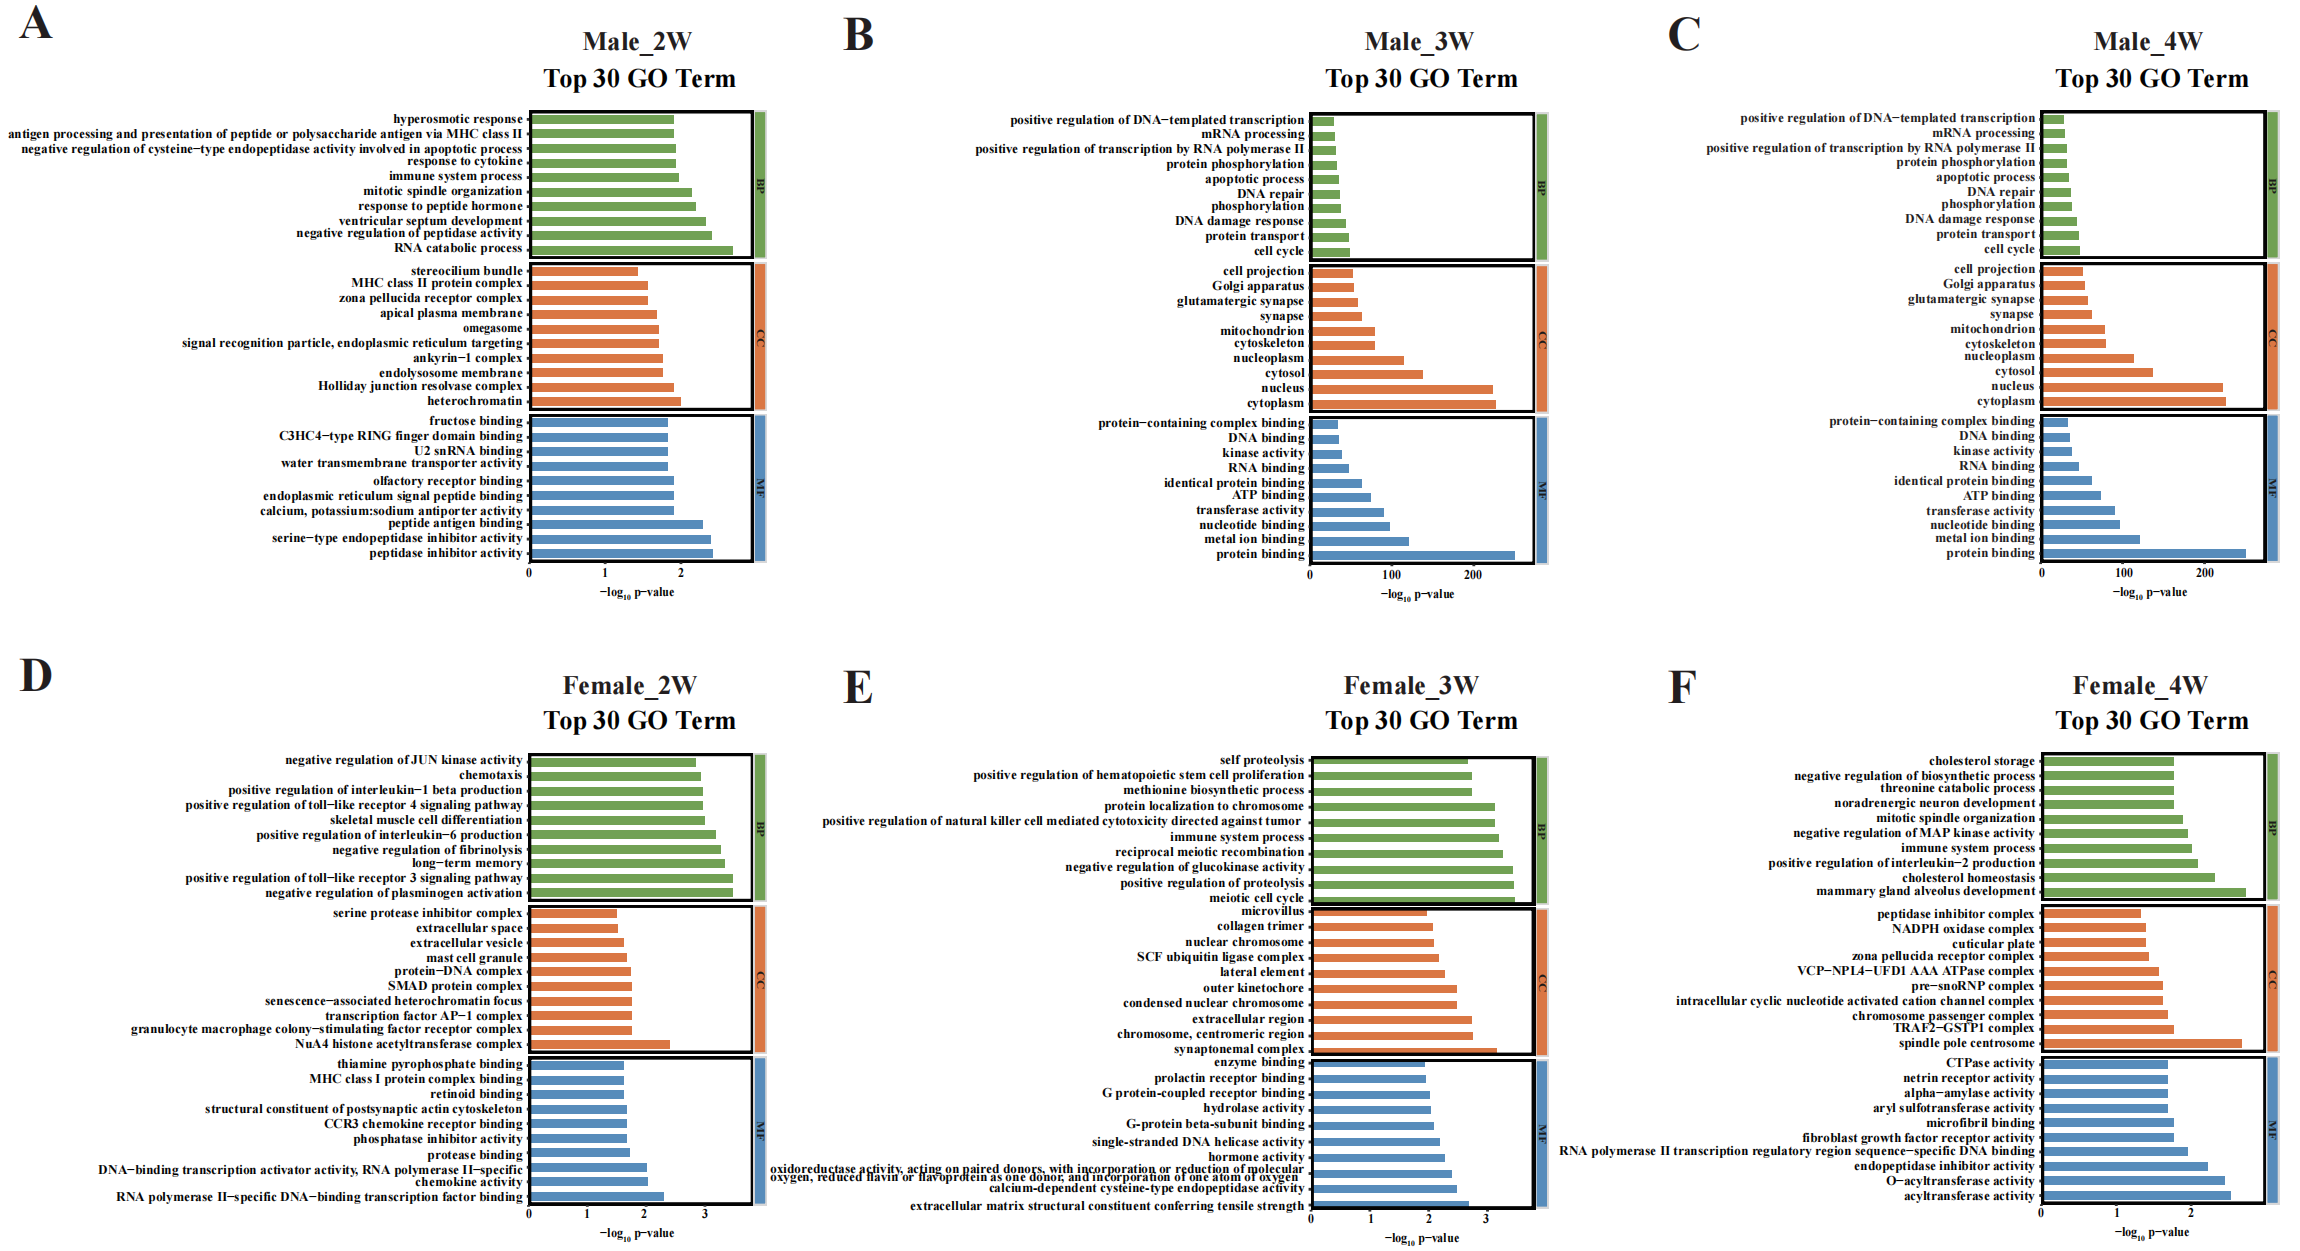


**Fig. 1. GO enrichment analysis of DEGs in male and female mice after SI**

(A-C) GO enrichment analysis of DEGs in male mice at 2, 3, and 4 weeks of isolation, highlighting the top 30 significantly enriched terms across three categories: BP, CC, and MF.

(D-F) GO enrichment analysis of DEGs in female mice at 2, 3, and 4 weeks of isolation, highlighting the top 30 significantly enriched terms across BP, CC, and MF.

BP: biological Process; CC: cellular components;MF: molecular functions.


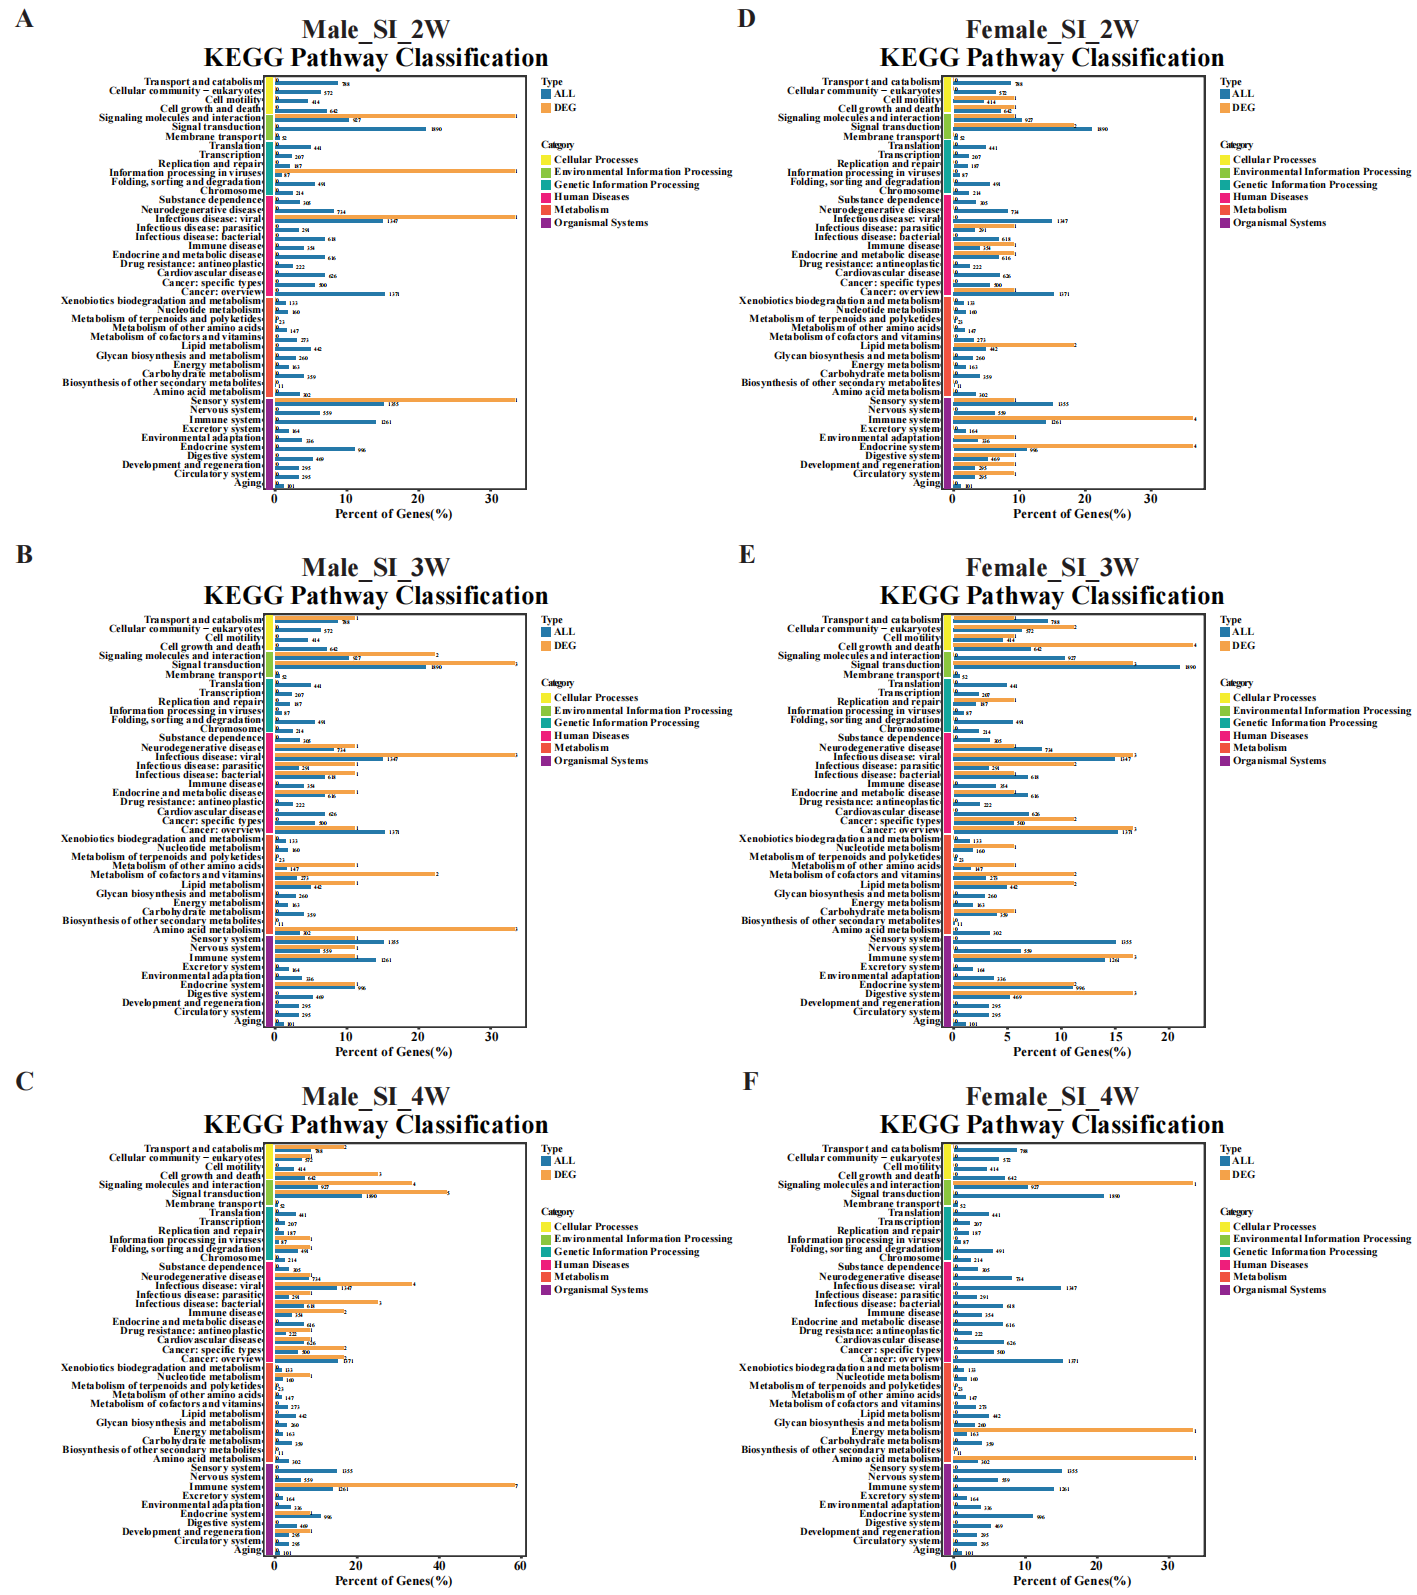


**Fig. 2. KEGG pathway classification of key DEGs in male and female mice after SI**

(A-C) KEGG pathway classification of key DEGs in male mice at 2, 3, and 4 weeks of isolation.

(D-F) KEGG pathway classification of key DEGs in female mice at 2, 3, and 4 weeks of isolation.
